# Supplementary material
Source: PubMed Central journal article supplement (PMC2708681)
Supplement: 0903854106_ST1_PDF.pdf [file 0903854106_ST1_PDF.pdf]

**Table S1 - BCL2 mutations in DLBCL cell lines and primary cases**

| Sample           | BCL2 locus              | # of mutations | Mutations                                                                                                                                                                                                                                                                                                                                                                                                                                                                                                                                                                                                                                                                                                                                                                                                                                                                                       | AA changes                                                                                     | Mut. frequency <sup>6</sup> | Polymorphisms                                                                                      |
|------------------|-------------------------|----------------|-------------------------------------------------------------------------------------------------------------------------------------------------------------------------------------------------------------------------------------------------------------------------------------------------------------------------------------------------------------------------------------------------------------------------------------------------------------------------------------------------------------------------------------------------------------------------------------------------------------------------------------------------------------------------------------------------------------------------------------------------------------------------------------------------------------------------------------------------------------------------------------------------|------------------------------------------------------------------------------------------------|-----------------------------|----------------------------------------------------------------------------------------------------|
| Ly2 <sup>1</sup> | t(14;18) <sup>1,2</sup> | 107            | D7bp -460-454, C-445T, C-444T, G-436A, G-427A, +C stretch -411-407, C-401T, T-397C, A-377T, T-356C, A-334G, G-330T, T-320C, C-311G, T-300C, C-290T, A-289T, T-286A, G-285A, C-239T, C-222G, G202A, G-180C, T-178G, G-161A, C-160A, A-137G, A-125G, T-96A, T-46C, G-39C, A10G, G83A, C99T, A119T, G128T, A130T, A141C, G149C, G191A, A200C, T203A, A210G, G231C, A254G, G261A, T289C, A290T, T295G, T322A, T334C, T357C, C360G, G370A, A400T, T424C, G428C, T431C, C462G, T470C, A506T, A532G, T618A, G620A, G624C, C640T, T641A, G659A, G663A, G666C +/-, D14bp 685-98, A711G, G729A +/-, <u>T744C, T774C, C848T +/-, T859C, C975T, C1106T, C1197T, C1274T</u> , A1383T, A1384C, A1408G, C1442A, A1509G, G1513C, T1515C, G1517A, T1522A, G1524A, G1549C, A1559G +/-, G1570C, T1571A, T1575G, A1579T, G1588A, G1599C, C1634T +/-, T1669C, T1670C, C1727T, C1731T, A1759G, A2016G, T2377C, C2554T | T744C, T774C, C848T (A45V), T859C (F49L), G969A, C975T, C1106T (A131V), C1197T, C1274T (T187I) | 1.528                       | G65C +/-, <u>G969A</u> (silent) +/-, G2653A +/-                                                    |
| Ly3              | t(14;18) <sup>2</sup>   | 3              | C-353T, <u>C1197T</u> , C1307T                                                                                                                                                                                                                                                                                                                                                                                                                                                                                                                                                                                                                                                                                                                                                                                                                                                                  | C1197T                                                                                         | 0.038                       | G65C +/-, C1438G +/-, G2653A +/-                                                                   |
| Ly4              | - <sup>2</sup>          | 0              | -                                                                                                                                                                                                                                                                                                                                                                                                                                                                                                                                                                                                                                                                                                                                                                                                                                                                                               | -                                                                                              | 0.000                       | C-224A +/-, G65C +/-, <u>A735G</u> (silent) +/-, G1650T +/-, G2653A +/-                            |
| Ly7              | - <sup>2</sup>          | 0              | -                                                                                                                                                                                                                                                                                                                                                                                                                                                                                                                                                                                                                                                                                                                                                                                                                                                                                               | -                                                                                              | 0.000                       | G65C +/-, G2653A +/-                                                                               |
| Ly8              | t(14;18) <sup>2</sup>   | 37             | T-47C, C71G, C72T, C99G, A242G, A317C, G370A, C497T, C498T, <u>G753A, G780A, G895A, G967A, C997G, G1071A, G1100A, G1224A</u> , G1303A, G1328C, T1385A, G1391A, T1409G, C1461T, C1514T, G1543A, G1599C, G1646C, A1672G, T1684G, G1924A, G2178A, G2312T, G2428A, G2522A, G2643A, T3057C, C3078G                                                                                                                                                                                                                                                                                                                                                                                                                                                                                                                                                                                                   | G753A, G780A, G895A (A61T), G967A, G969A (A85T), C997G (L95V), G1071A, G1100A (R129H), G1224A  | 0.471                       | C-224A +/-, G65C +/-, G697A +/-, <u>G841A</u> (A43T) +/-, <u>G969A</u> +/-, G1650T +/-, G2653A +/- |
| Ly10             | Amplification           | 15             | C-14T, C91T, A92C, C194T, C194G, G212C, D11bp 414-24, C462T, G509C, G620C, D13bp 687-99, <u>C970T</u> , C1324T, C1443G, D10bp 1510-9                                                                                                                                                                                                                                                                                                                                                                                                                                                                                                                                                                                                                                                                                                                                                            | C970T (L86F)                                                                                   | 0.190                       | C-224A +/-, G65C +/-, <u>C1014T</u> (silent), G1650T +/-, G2653A +/-                               |
| Ly18             | t(14;18) <sup>2</sup>   | 44             | C-460G, C-415T, G-337C, C-304A, A-296C, T-273C, T-51G, T-48C, T-16A, T-6C, A130C, C189A, A193C, G263C, T270C, G280A, C316T, G382A, T391C, A400G, G449A, T460A, C476G, G479A, C632G, C667T, <u>C771G, C781T, T784G, A984T, C997G, C997T, G1059C, G1178C, C1230A</u> , G1419A, A1478T, G1491A, G1517A, A1534C, C1544G, C1609T, C1671T, A2887C                                                                                                                                                                                                                                                                                                                                                                                                                                                                                                                                                     | C771G (I19M), C781T, T784G (S24A), A984T, C997G, C997T (L95V), G1178C (G155A), C1230A (N172K)  | 0.558                       | G65C +/-, C1400T +/-, G2653A +/-                                                                   |

|         |                       |    |                                                                                                                                                                                                                                                                                                                                                                                                                                                                                                                                      |                                                                                                                                    |       |                                                                                     |
|---------|-----------------------|----|--------------------------------------------------------------------------------------------------------------------------------------------------------------------------------------------------------------------------------------------------------------------------------------------------------------------------------------------------------------------------------------------------------------------------------------------------------------------------------------------------------------------------------------|------------------------------------------------------------------------------------------------------------------------------------|-------|-------------------------------------------------------------------------------------|
| RC-K8   | - <sup>2</sup>        | 0  | -                                                                                                                                                                                                                                                                                                                                                                                                                                                                                                                                    | -                                                                                                                                  | 0.000 | G65C+/, <u>G841A</u> (A43T) +/-, G2653A +/-                                         |
| SUDHL6  | t(14;18) <sup>2</sup> | 55 | T-755C, G-660A, C-571T, C-489T, T-441C, T-440C, A-432G, +G -425, A-416G, C-413G, C-411T, C-357T, A-355G, C-322T, G-291C, C-284G, D13bp -190-178, G-139A, A-77G, T-76C, T-16C, T113A, A145C, G191A, A290C, C328G, T354A, A361G, A372T, G377A, A379T, T406G, A433G, G449C, C457A, A489G, A518C, T533A, T618G, A712G, <u>C734G, A735T, G738T, A856T, G927A, G930A, C1099T, C1343T, T1395C, DA stretch 1410-3, G1599T, C1600T, G1605A, C1609T, G2470A</u>                                                                                | C734G, A735T (T7S), G738T, A856T (I48F), G927A, G930A, C1099T (R129C)                                                              | 0.698 | G65C +/-, G2653A +/-                                                                |
| VAL     | t(14;18) <sup>2</sup> | 60 | G-800T, G-453A, G-429A, C-395G, C-378A, C-346T, C-311G, C-170A, C-131T, A119G, G219T, A241T, T244C, A254C, T267G, dupl. 38bp 229-266 at pos. 267, C328A, T460G, C462T, T473A, G479T, A495G, G624C, T638C, T699A, <u>G728A, A745C, C858T, A878C, C970G, C985T, C1106T, G1149A, G1178C, G1179A, C1230T, A1383G, C1443G, G1462C, T1483G, T1495C, C1510G, C1514G, G1537A, T1546C, T1578C, C1600G, G1606C, C1647T, C1671T, T1684A, T1693A, C1695T, T1707G, dupl. 108bp 1604-1711 at pos. 1712, C1746G, T1751C, T1788C, A2117T, A2138G</u> | G728A (G5E), A745C (N11H), C858T, A878C (H55P), C970G (L86V), C985T (P91S), C1106T (A131V), G1149A, G1178C (G155A), G1179A, C1230T | 0.759 | C-322A, C-160T, G65C +/-, G2653A +/-                                                |
| SUDHL4  | t(14;18) <sup>2</sup> | 38 | D31bp -466-436, A-435C, G-347A, C-307T, T-288C, C-219T, T-216A, C-207T, T88G, T100G, T153G, T195C, T203A, C272T, C309T, A335G, C336G, C447G, C457A, D4bp 469-472, C590T, C621G, C634T, G714T, <u>A849G, C867G, C889A, C1065G, A1509T, A1535C, A1551T, A1579T, C1580G, C1581T, C1583T, A1642C, G1704C, A1828G</u>                                                                                                                                                                                                                     | A849G, C867G, C889A (P59A), C1065G (S117R)                                                                                         | 0.489 | G65C +/-, G697A +/-, C1400T +/-, G2653A +/-                                         |
| SUDHL5  | - <sup>2</sup>        | 0  | -                                                                                                                                                                                                                                                                                                                                                                                                                                                                                                                                    | -                                                                                                                                  | 0.000 | C-224A +/-, G65C +/-, <u>C1014T</u> (silent), G1650T +/-, G2653A +/-                |
| SUDHL7  | - <sup>2</sup>        | 15 | C-599T, A-296G, G-261C, C172T, C351T, dupl. 54bp 406-59 pos. 460, A459G, A461T, C462G, T478C, +C stretch 689-93, G694C, G2470A, G2596C, A2682C                                                                                                                                                                                                                                                                                                                                                                                       | -                                                                                                                                  | 0.211 | G65C +/-, G697A +/-, G2653A +/-                                                     |
| SUDHL10 | - <sup>2</sup>        | 1  | T627C                                                                                                                                                                                                                                                                                                                                                                                                                                                                                                                                | -                                                                                                                                  | 0.013 | C-224A +/-, G65C +/-, <u>A735G</u> (silent) +/-, G1650T +/-, G2653A +/-             |
| DB      | t(14;18) <sup>2</sup> | 0  | -                                                                                                                                                                                                                                                                                                                                                                                                                                                                                                                                    | -                                                                                                                                  | 0.000 | G65C+/, G2653A +/-                                                                  |
| WSU     | t(14;18) <sup>2</sup> | 9  | C-562T, A-17T, G6C, C185G, G678A, G679A, <u>G724A</u> , C1329G, A1801G                                                                                                                                                                                                                                                                                                                                                                                                                                                               | G724A (A4T)                                                                                                                        | 0.115 | C-224A +/-, G65C +/-, <u>A735G</u> (silent) +/-, C1400T +/-, G1650T +/-, G2653A +/- |
| SUDHL2  | - <sup>2</sup>        | 0  | -                                                                                                                                                                                                                                                                                                                                                                                                                                                                                                                                    | -                                                                                                                                  | 0.000 | G65C +/-, G2653A +/-                                                                |

|       |                            |    |                                                                                                                                                                                                                                                                                                            |                                |       |                                                                                                                      |
|-------|----------------------------|----|------------------------------------------------------------------------------------------------------------------------------------------------------------------------------------------------------------------------------------------------------------------------------------------------------------|--------------------------------|-------|----------------------------------------------------------------------------------------------------------------------|
| RIVA  | Amplification <sup>2</sup> | 0  | -                                                                                                                                                                                                                                                                                                          | -                              | 0.000 | C-224A +/-, G65C +/-, <u>A735G</u><br>(silent) +/-, G1650T +/-,<br>G2653A +/-                                        |
| U2932 | Amplification <sup>2</sup> | 0  | -                                                                                                                                                                                                                                                                                                          | -                              | 0.000 | G65C +/-, G2653A +/-                                                                                                 |
| HBL1  | - <sup>2</sup>             | 2  | C-146T, C385A                                                                                                                                                                                                                                                                                              | -                              | 0.026 | C-224A +/-, G65C +/-, C698T<br>+/-, G1650T +/-, G2653A +/-                                                           |
| Ramos | -                          | 0  | -                                                                                                                                                                                                                                                                                                          | -                              | 0.000 | C-224A +/-, G65C +/-, <u>A735G</u><br>(silent) +/-, G1650T +/-,<br>G2653A +/-                                        |
|       |                            |    |                                                                                                                                                                                                                                                                                                            |                                |       |                                                                                                                      |
| 2012  | -                          | 0  | -                                                                                                                                                                                                                                                                                                          | -                              | 0.000 | C-224A +/-, G65C +/-, G1650T<br>+/-, G2653A +/-                                                                      |
| 2015  | - <sup>3</sup>             | 0  | -                                                                                                                                                                                                                                                                                                          | -                              | 0.000 | C-224A +/-, G65C +/-, <u>A735G</u><br>(silent) +/-, G1650T +/-,<br>G2653A +/-                                        |
| 2016  | -                          | 0  | -                                                                                                                                                                                                                                                                                                          | -                              | 0.000 | G65C +/-, G2653A +/-                                                                                                 |
| 2017  | -                          | 0  | -                                                                                                                                                                                                                                                                                                          | -                              | 0.000 | C-224A +/-, G65C +/-, <u>A735G</u><br>(silent) +/-, G1650T +/-,<br>G2653A +/-                                        |
| 2019  | Amplification              | 0  | -                                                                                                                                                                                                                                                                                                          | -                              | 0.000 | C-224A +/-, G65C +/-, <u>A735G</u><br>(silent) +/-, G1650T +/-,<br>G2653A +/-                                        |
| 2020  | -                          | 0  | -                                                                                                                                                                                                                                                                                                          | -                              | 0.000 | C-224A +/-, G65C +/-, <u>C1014T</u><br>(silent), G2653A +/-                                                          |
| 2023  | -                          | 0  | -                                                                                                                                                                                                                                                                                                          | -                              | 0.000 | G65C +/-, G2653A +/-                                                                                                 |
| 2024  | -                          | 1  | G404C                                                                                                                                                                                                                                                                                                      | -                              | 0.015 | C-322A +/-, A-309G +/-, C-<br>224A +/-, C-160T +/-, +GGG<br>stretch 61-4 +/-, G65C +/-,<br>G2653A +/-                |
| 2025  | -                          | 0  | -                                                                                                                                                                                                                                                                                                          | -                              | 0.000 | C-322A +/-, A-309G +/-, C-<br>160T +/-, +GGG stretch 61-4<br>+/-, G65C +/-, <u>A735G</u> (silent)<br>+/-, G2653A +/- |
| 2026  | -                          | 1  | G263A                                                                                                                                                                                                                                                                                                      | -                              | 0.014 | C-224A +/-, G65C +/-, G1650T<br>+/-, G2653A +/-                                                                      |
| 2027  | Translocated               | 32 | G-796C, C-562T, G-540A, D3bp -<br>537-5, G-531A, A-529C, G-429C,<br>G-361A, A-265G, T-104C, T-52A,<br>DC 39, C40T, T44C, T47A, T48C,<br>C301A, A315T, T371C, A396G,<br>T405C, T519G, A554G, <u>G765C</u> ,<br><u>G780A</u> , <u>G1239T</u> , T1357G, C1449T,<br>G1590T, D12bp 1592-1603,<br>A2480G, G2499C | G765C (K17N),<br>G780A, G1239T | 0.453 | G65C +/-, G2653A +/-                                                                                                 |
| 2029  | -                          | 0  | -                                                                                                                                                                                                                                                                                                          | -                              | 0.000 | C-224A +/-, G65C +/-, G2653A<br>+/-                                                                                  |
| 2031  | - <sup>3</sup>             | 0  | -                                                                                                                                                                                                                                                                                                          | -                              | 0.000 | C-224A +/-, G65C +/-, <u>A735G</u><br>(silent) +/-, G1650T +/-,<br>G2653A +/-                                        |

|                   |                |   |                                            |              |       |                                                                                                                                    |
|-------------------|----------------|---|--------------------------------------------|--------------|-------|------------------------------------------------------------------------------------------------------------------------------------|
| 2032              | -              | 0 | -                                          | -            | 0.000 | C-322A +/-, A-309G +/-, C-160T +/-, +GGG stretch 61-4 +/-, G65C +/-, G2653A +/-                                                    |
| 2033              | Amplification  | 1 | G1570T                                     | -            | 0.015 | G65C +/-, G2653A +/-                                                                                                               |
| 2034              | Amplification  | 0 | -                                          | -            | 0.000 | C-322A +/-, A-309G +/-, C-224A +/-, C-160T +/-, +GGG stretch 61-4 +/-, G65C +/-, <u>A735G</u> (silent) +/-, G1650T +/-, G2653A +/- |
| 2035              | Translocated   | 0 | -                                          | -            | 0.000 | C-224A +/-, G65C +/-, A735G (silent) +/-, G1650T +/-, T1900C +/-, G2653A +/-                                                       |
| 2036              | -              | 0 | -                                          | -            | 0.000 | G65C +/-, G2653A +/-                                                                                                               |
| 2037              | -              | 0 | -                                          | -            | 0.000 | C-224A +/-, G65C +/-, <u>A735G</u> (silent) +/-, G1650T +/-, G2653A +/-                                                            |
| 2038              | -              | 0 | -                                          | -            | 0.000 | C-322A +/-, A-309G +/-, C-224A +/-, C-160T +/-, +GGG stretch 61-4 +/-, G65C +/-, <u>A735G</u> (silent) +/-, G1650T +/-, G2653A +/- |
| 2040 <sup>5</sup> | -              | 0 | -                                          | -            | 0.000 | +19 bp<br>(CGCCCGCCGCTCCCGC<br>C) pos. -719, C-224A +/-, G65C +/-, <u>C1014T</u> (silent), G1650T +/-, G2653A +/-                  |
| 2041              | Amplification  | 0 | -                                          | -            | 0.000 | C-224A +/-, G65C +/-, <u>A735G</u> (silent) +/-, G1650T +/-, G2653A +/-                                                            |
| 2043              | - <sup>3</sup> | 1 | A1756G                                     | -            | 0.014 | C-224A +/-, G65C +/-, G2653A +/-                                                                                                   |
| 2046              | -              | 0 | -                                          | -            | 0.000 | G65C +/-, G2653A +/-                                                                                                               |
| 2047              | -              | 0 | -                                          | -            | 0.000 | C-322A +/-, A-309G +/-, C-160T +/-, +GGG 61-4 +/-, G65C +/-, C582T +/-, G2653A +/-                                                 |
| 2053              | -              | 0 | -                                          | -            | 0.000 | C-224A +/-, G65C +/-, <u>A735G</u> (silent) +/-, G1650T +/-, G2653A +/-                                                            |
| 2057              | -              | 0 | -                                          | -            | 0.000 | C-224A +/-, G65C +/-, <u>A735G</u> (silent) +/-, G1650T +/-, G2653A +/-                                                            |
| 2059              | Amplification  | 4 | C-28T, G167A, <u>D14bp 780-93</u> , G1599A | D14bp 780-93 | 0.056 | G65C +/-, C698T, G2653A +/-                                                                                                        |
| 2060              | -              | 0 | -                                          | -            | 0.000 | C-224A +/-, G65C +/-, <u>A735G</u> (silent) +/-, G1650T +/-, G2653A +/-                                                            |
| 2061              | -              | 0 | -                                          | -            | 0.000 | C-224A +/-, G65C +/-, <u>A735G</u> (silent) +/-, G1650T +/-, G2653A +/-                                                            |

|                   |               |     |                                                                                                                                                                                                                                                                                                                                                                                                                                                                                                                                                                                                                                                                                                                                                                                                                                                                                                                                                                                                                                                                                                                                                                                                                                                                                                                                                                                                                                                                                                                                          |                                                                                                                                                                                                                                             |       |                                                                                                                                    |
|-------------------|---------------|-----|------------------------------------------------------------------------------------------------------------------------------------------------------------------------------------------------------------------------------------------------------------------------------------------------------------------------------------------------------------------------------------------------------------------------------------------------------------------------------------------------------------------------------------------------------------------------------------------------------------------------------------------------------------------------------------------------------------------------------------------------------------------------------------------------------------------------------------------------------------------------------------------------------------------------------------------------------------------------------------------------------------------------------------------------------------------------------------------------------------------------------------------------------------------------------------------------------------------------------------------------------------------------------------------------------------------------------------------------------------------------------------------------------------------------------------------------------------------------------------------------------------------------------------------|---------------------------------------------------------------------------------------------------------------------------------------------------------------------------------------------------------------------------------------------|-------|------------------------------------------------------------------------------------------------------------------------------------|
| 2062              | -             | 53  | A-798G, G-787A, D94bp -748-655, G-639A, A-434G, A-426G, C-415T, T-324C, C-284T, A-276G, T-250A, G-180A, G-132A, A-125C, G-23A, A37G, G74A, A103T, T113G, A141T, A145T, T147A, G191C, T195C, A241T, G308T, T322C, G332A, A335C, T337C, C351T, C362T, T371C, A379G, C386A, T391C, T395C, T405G, A468G, A472G, <u>C747T</u> , <u>G854A</u> , <u>C1008T</u> , <u>A1098G</u> , C1376A, C1400T, A1413C, G1419C, A1500C, C1544T, A1579C, A1598T, G1605T, T1639C, A1719G, C2650G                                                                                                                                                                                                                                                                                                                                                                                                                                                                                                                                                                                                                                                                                                                                                                                                                                                                                                                                                                                                                                                                 | C747T, C1008T, A1098G                                                                                                                                                                                                                       | 0.764 | C-224A +/-, G65C +/-, <u>C328T</u> +/-, <u>G854A</u> (G47D) +/-, <u>C1400T</u> +/-, G1650T +/-, G2653A +/-                         |
| 2063              | Amplification | 0   | -                                                                                                                                                                                                                                                                                                                                                                                                                                                                                                                                                                                                                                                                                                                                                                                                                                                                                                                                                                                                                                                                                                                                                                                                                                                                                                                                                                                                                                                                                                                                        | -                                                                                                                                                                                                                                           | 0.000 | C-224A +/-, G65C +/-, <u>A735G</u> (silent) +/-, G1650T +/-, G2653A +/-                                                            |
| 2065              | -             | 1   | C421T                                                                                                                                                                                                                                                                                                                                                                                                                                                                                                                                                                                                                                                                                                                                                                                                                                                                                                                                                                                                                                                                                                                                                                                                                                                                                                                                                                                                                                                                                                                                    | -                                                                                                                                                                                                                                           | 0.014 | C-322A +/-, A-309G +/-, C-224A +/-, C-160T +/-, +GGG stretch 61-4 +/-, G65C +/-, <u>A735G</u> (silent) +/-, G1650T +/-, G2653A +/- |
| 2067              | Translocated  | 173 | T-178A, G-174A, A-95G, A-85G, A-78T, A-73G, C-56T, T-51A, G-39A, T-6A, T-5C, T1G, A16G, G22A, C31G, T51G, C78T, A79C, G84T, A97C, G98A, T100G, A109G, C115T, G129A, T131C, T140C, A145G, G149A, T156C, T158C, T159C, G168A, G188A, A193C, C194T, A207G, G208C, A210G, A211C, A227C, A228T, G231A, G232C, A237T, G239T, A241C, C243G, A253C, T267C, T273C, T298A, G308A, T318C, T321A, T322C, A335C, A341T, T358C, T371C, G377A, C381G, G388A, T392G, T393C, T402A, T418A, C434T, A444G, +GAAGTC pos. 445, A452G, T454C, C457T, A461T, A465G, A471G, A472C, T473G, A475G, G503C, G510C, A512G, C522A, C531T, A546G, G552A, T555G, G561T, T572C, A576G, A596T, A600G, A617G, G620A, A625C, T638A, D7bp 665-71, G684A, C689G, G708A, G709C, G714A, <u>A733T</u> , <u>A740C</u> , <u>C741T</u> , <u>C768T</u> , <u>C781T</u> , <u>G786A</u> , <u>G810T</u> , <u>T857G</u> , <u>G895A</u> , <u>C900T</u> , <u>G902C</u> , <u>G909C</u> , <u>C1069T</u> , <u>T1084C</u> , <u>C1106A</u> , <u>A1201G</u> , <u>C1230T</u> , <u>A1231G</u> , <u>C1260T</u> , <u>G1263A</u> , <u>C1272G</u> , <u>A1273T</u> , G1386C, T1409A, C1429T, T1440A, C1446G, T1450C, C1488A, C1492T, C1514A, D13bp 1533-45, T1563A, T1575A, dupl. 39 bp 1613-51 pos. 1652, C1617T, C1634T, C1657G, T1682A, T1684C, C1715G, C1727T, T1764G, A1787G, A1828C, A1837T, G1852C, A1889G, A1897T, T1901G, T1979A, A2040C, A2150G, T2161A, T2227A, T2249C, T2268C, T2279C, T2297C, A2299G, T2368C, T2379C, A2382G, T2383C, T2425G, A2446G, A2473T, T2504C, A2539G, C2554T, A2660T | A733T (T7S), A740C, C741T (Y9S), C768T, C781T, G786A, G810T, T857G (I48S), G895A (A61T), C900T, G902C (R63P), G909C, C1069T, T1084C (F124L), C1106A (A131D), A1201G (N163D), C1230T, A1231G (I173V), C1260T, G1263A, C1272G (H186Q), A1273T | 2.445 | C-224A +/-, G65C +/-, <u>C328T</u> +/-, <u>G697A</u> +/-, <u>C698T</u> +/-, <u>A735G</u> (silent) +/-, G1650T +/-, G2653A +/-      |
| 2069 <sup>5</sup> | Translocated  | 2   | G-180A (?), <u>C1038T</u> (?)                                                                                                                                                                                                                                                                                                                                                                                                                                                                                                                                                                                                                                                                                                                                                                                                                                                                                                                                                                                                                                                                                                                                                                                                                                                                                                                                                                                                                                                                                                            | C1038T                                                                                                                                                                                                                                      | 0.028 | C-322A +/-, A-309G +/-, C-224A +/-, C-160T +/-, +GGG stretch 61-4 +/-, G65C +/-, <u>A735G</u> (silent) +/-, G1650T +/-, G2653A +/- |

|      |                |   |                                                   |                        |       |                                                                                                                                                 |
|------|----------------|---|---------------------------------------------------|------------------------|-------|-------------------------------------------------------------------------------------------------------------------------------------------------|
| 2072 | - <sup>3</sup> | 0 | -                                                 | -                      | 0.000 | C-224A +/+, G65C +/+, <u>A735G</u><br>(silent) +/-, G1650T +/-,<br>G2653A +/+                                                                   |
| 2073 | -              | 0 | -                                                 | -                      | 0.000 | G65C +/+, G2653A +/+                                                                                                                            |
| 2075 | - <sup>3</sup> | 0 | -                                                 | -                      | 0.000 | G65C +/+, G2653A +/+                                                                                                                            |
| 2076 | -              | 0 | -                                                 | -                      | 0.000 | C-224A +/-, G65C +/+, <u>A735G</u><br>(silent) +/-, G1650T +/-,<br>G2653A +/+                                                                   |
| 2078 | Translocated   | 4 | C1461T, G1730C, A1840G, T1863C                    | -                      | 0.057 | G65C +/+, G2653A +/+                                                                                                                            |
| 2082 | -              | 0 | -                                                 | -                      | 0.000 | G65C +/+, G2653A +/+                                                                                                                            |
| 2085 | -              | 0 | -                                                 | -                      | 0.000 | G65C +/+, G2653A +/+                                                                                                                            |
| 2087 | - <sup>3</sup> | 0 | -                                                 | -                      | 0.000 | G65C +/+, <u>A735G</u> (silent) +/-,<br>G1360A +/-, G1650T +/-,<br>T1900C +/-, G2653A +/+                                                       |
| 2089 | -              | 0 | -                                                 | -                      | 0.000 | C-224A +/+, G65C +/+, <u>A735G</u><br>(silent) +/-, G1650T +/-,<br>G2653A +/+                                                                   |
| 2091 | -              | 5 | C53T, G98A, G129A, <u>G753A</u> ,<br><u>C850T</u> | G753A, C850T<br>(P46S) | 0.071 | C-224A +/-, G65C +/+, <u>C1014T</u><br>(silent), G1650T +/-, G2653A<br>+/+                                                                      |
| 2093 | -              | 0 | -                                                 | -                      | 0.000 | G65C +/+, G2653A +/+                                                                                                                            |
| 2094 | - <sup>3</sup> | 0 | -                                                 | -                      | 0.000 | C-224A +/-, G65C +/+, <u>A735G</u><br>(silent) +/-, G1650T +/-,<br>G2653A +/+                                                                   |
| 2096 | -              | 0 | -                                                 | -                      | 0.000 | C-322A +/-, A-309G +/-, C-<br>224A +/+, C-160T +/-, +GGG<br>stretch 61-4 +/-, G65C +/+,<br><u>A735G</u> (silent) +/-, G1650T<br>+/-, G2653A +/+ |
| 2097 | -              | 0 | -                                                 | -                      | 0.000 | C-224A +/+, G65C +/+, <u>A735G</u><br>(silent) +/-, G1650T +/-,<br>G2653A +/+                                                                   |
| 2099 | - <sup>4</sup> | 0 | -                                                 | -                      | 0.000 | C-224A +/-, G65C +/+, <u>A735G</u><br>(silent) +/-, G1650T +/-,<br>T1900C +/-, G2653A +/+                                                       |
| 2100 | -              | 0 | -                                                 | -                      | 0.000 | C-224A +/+, G65C +/+, <u>A735G</u><br>(silent) +/-, G1650T +/-,<br>G2653A +/+                                                                   |
| 2101 | -              | 0 | -                                                 | -                      | 0.000 | C-224A +/-, G65C +/+, <u>A735G</u><br>(silent) +/-, G1650T +/-,<br>G2653A +/+                                                                   |
| 2102 | -              | 0 | -                                                 | -                      | 0.000 | C-224A +/-, G65C +/+, <u>A735G</u><br>(silent) +/-, G1650T +/-,<br>G2653A +/+                                                                   |

|      |                |     |                                                                                                                                                                                                                                                                                                                                                                                                                                                                                                                                                                                                                                                                                                                                                                                                          |                                                         |       |                                                                                                                                             |
|------|----------------|-----|----------------------------------------------------------------------------------------------------------------------------------------------------------------------------------------------------------------------------------------------------------------------------------------------------------------------------------------------------------------------------------------------------------------------------------------------------------------------------------------------------------------------------------------------------------------------------------------------------------------------------------------------------------------------------------------------------------------------------------------------------------------------------------------------------------|---------------------------------------------------------|-------|---------------------------------------------------------------------------------------------------------------------------------------------|
| 2104 | -              | 0   | -                                                                                                                                                                                                                                                                                                                                                                                                                                                                                                                                                                                                                                                                                                                                                                                                        | -                                                       | 0.000 | C-224A +/-, G65C +/-, <u>A735G</u> (silent) +/-, G1650T +/-, G2653A +/-                                                                     |
| 2105 | Translocated   | 32  | A-798T, C-517T, A-432G, T-420G, A-355G, C-284T, T-273C, A-118C, G-39A, C-28T, A13C, G28C, C105T, A242G, A271G, C301G, T314A, A335C, A379G, A557G, C590A, A607T, <u>C1106A</u> , <u>G1251C</u> , G1306A, G1517A, G1605A, G1606A, A1961C, T2266C, T2297C, T2512A                                                                                                                                                                                                                                                                                                                                                                                                                                                                                                                                           | C1106A (A131D), G1251C (E179D)                          | 0.451 | C-224A +/-, G65C +/-, <u>A735G</u> (silent) +/-, G1650T +/-, G2653A +/-                                                                     |
| 2106 | Translocated   | 100 | G-810A, G-566A, G-563A, A-529C, T-524C, G-497C, G-436A, G-427A, A-425G, C-414A, G-176C, T-162C, G-153C, A-118G, A-97G, C-94T, C-68A, T-54A, T-52C, T-50C, T-49C, T-45G, G-18C, G-9A, G-8C, G6T, A10T, G11T, T30C, A52T, C99G, A141C, T159C, A165G, A166G, A169G, C189A, A193T, C194T, A200C, A204G, G212T, A254G, T260G, A271T, C272T, C281T, T314C, A317G, A335G, C336T, C351T, A365T, C373T, A379T, A380G, T391C, T392G, D26bp 398-424, G438T, T443A, G449C, T451G, T453G, T460A, T464G, C466G, A468C, T470G, A475T, T482A, T490A, A493C, G494C, A501G, A515G, A517C, T533C, A554C, A558G, A596G, G603C, T626G, T629A, T647G, G659A, C698G, T700C, G713A, G714C, <u>C864T</u> , <u>C893G</u> , <u>C900G</u> , <u>C1035G</u> , <u>G1077C</u> , <u>G1179C</u> , T1357C, C1510T, A1559T, D289bp 1568-1857 | C864T, C893G (A60D), C900G, C1035G, G1077C, G1179C      | 1.408 | C-322A +/-, A-309G +/-, C-224A +/-, C-160T +/-, +GGG stretch 61-4 +/-, G65C, <u>A735G</u> (silent) +/-, <u>G854A</u> (G47D) +/-, G2653A +/- |
| 2108 | -              | 0   | -                                                                                                                                                                                                                                                                                                                                                                                                                                                                                                                                                                                                                                                                                                                                                                                                        | -                                                       | 0.000 | G65C +/-, G2653A +/-                                                                                                                        |
| 2109 | Translocated   | 11  | A9G, T331C, G428C, G510C, C621T, G714C, <u>G814C</u> , <u>C1052G</u> , <u>G1100T</u> , G1529C, T1578C                                                                                                                                                                                                                                                                                                                                                                                                                                                                                                                                                                                                                                                                                                    | G814C (D34H), C1052G (A113G), G1100T (R129L)            | 0.156 | C-486T, C-322A +/-, A-309G +/-, C-160T +/-, +GGG stretch 61-4 +/-, G65C +/-, C328T +/-, G2653A +/-                                          |
| 2110 | -              | 0   | -                                                                                                                                                                                                                                                                                                                                                                                                                                                                                                                                                                                                                                                                                                                                                                                                        | -                                                       | 0.000 | C-224A +/-, G65C +/-, <u>A735G</u> (silent) +/-, G1650T +/-, T1900C +/-, G2653A +/-                                                         |
| 2113 | -              | 0   | -                                                                                                                                                                                                                                                                                                                                                                                                                                                                                                                                                                                                                                                                                                                                                                                                        | -                                                       | 0.000 | C-224A +/-, G65C +/-, <u>A735G</u> (silent) +/-, G1650T +/-, G2653A +/-                                                                     |
| 2115 | - <sup>3</sup> | 0   | -                                                                                                                                                                                                                                                                                                                                                                                                                                                                                                                                                                                                                                                                                                                                                                                                        | -                                                       | 0.000 | G65C +/-, <u>A735G</u> (silent) +/-, G1650T +/-, G2653A +/-                                                                                 |
| 2122 | Translocated   | 50  | G208A, G212C, G278C, C306T, G382T, C385G, T423C, A452C, T460A, A469T, T470G, A471C, A511G, A527T, A554G, G561T, A596T, G666A, G678A, DC 704, <u>G718A</u> , <u>G738A</u> , <u>G780A</u> , <u>C970T</u> , <u>T1085C</u> , G1390A, G1391A, G1425C, A1441G, C1443T, T1447C, C1465T, C1469T, A1509C, G1513C, G1517C, T1525C, C1540G, A1574G, C1580G, A1598G, C1600G, C1608G, C1695T, T1750C, C1774T, A1825C, A2542G, A2581C, A2609C                                                                                                                                                                                                                                                                                                                                                                          | G718A (A2F), G738A, G780A, C970T (L86F), T1085C (F124S) | 0.914 | G65C +/-, C328T +/-, C698T +/-, <u>A735G</u> (silent) +/-, G1650T +/-, G2653A +/-                                                           |
| 2124 | -              | 0   | -                                                                                                                                                                                                                                                                                                                                                                                                                                                                                                                                                                                                                                                                                                                                                                                                        | -                                                       | 0.000 | G65C +/-, G2653A +/-                                                                                                                        |

|                   |                |    |                                                                                                                                                                |                                   |       |                                                                                                                                    |
|-------------------|----------------|----|----------------------------------------------------------------------------------------------------------------------------------------------------------------|-----------------------------------|-------|------------------------------------------------------------------------------------------------------------------------------------|
| 2125              | -              | 2  | C673T, +T 1633                                                                                                                                                 | -                                 | 0.028 | G65C +/-, C1438G +/-, G2653A +/-                                                                                                   |
| 2126              | Translocated   | 21 | C-543G, A-454G, G-347C, G-305C, T-301C, C-284T, T-283A, T26G, T293A, A348T, T402A, A484G, C698G, G709A, T1385A, T1409G, G1524T, G1560A, G1561C, T1693A, A2480G | -                                 | 0.297 | G65C +/-, G2653A +/-                                                                                                               |
| 2127              | - <sup>3</sup> | 0  | -                                                                                                                                                              | -                                 | 0.000 | C-322A +/-, A-309G +/-, C-160T +/-, +GGG stretch 61-4 +/-, G65C +/-, G2653A +/-                                                    |
| 2130              | -              | 2  | G1328A, G1577T                                                                                                                                                 | -                                 | 0.028 | C-224A +/-, G65C +/-, <u>A735G</u> (silent) +/-, G1650T +/-, T1900C +/-, (G2653A +/-)                                              |
| 2132              | -              | 0  | -                                                                                                                                                              | -                                 | 0.000 | C-224A +/-, G65C +/-, <u>A735G</u> (silent) +/-, G1650T +/-, G2653A +/-                                                            |
| 2134              | Translocated   | 13 | G-31A, A9G, C215T, A241C, G263A, G449C, T451G, A558G, T680C, <u>G819C</u> , T1325G, T1342G, G1599C                                                             | G819C                             | 0.198 | C-322A +/-, A-309G +/-, C-224A +/-, C-160T +/-, +GGG stretch 61-4 +/-, G65C +/-, <u>A735G</u> (silent) +/-, G1650T +/-, G2653A +/- |
| 2135              | - <sup>3</sup> | 0  | -                                                                                                                                                              | -                                 | 0.000 | G65C +/-, C582T +/-, G2653A +/-                                                                                                    |
| 2136              | -              | 0  | -                                                                                                                                                              | -                                 | 0.000 | C-224A +/-, G65C +/-, <u>A735G</u> (silent) +/-, G1650T +/-, G2653A +/-                                                            |
| 2137              | - <sup>3</sup> | 0  | -                                                                                                                                                              | -                                 | 0.000 | C-322A +/-, A-309G +/-, C-224A +/-, C-160T +/-, +GGG stretch 61-4 +/-, G65C +/-, <u>A735G</u> (silent) +/-, G1650T +/-, G2653A +/- |
| 2138              | -              | 0  | -                                                                                                                                                              | -                                 | 0.000 | C-224A +/-, G65C +/-, <u>A735G</u> (silent) +/-, G1650T +/-, G2653A +/-                                                            |
| 2139              | -              | 0  | -                                                                                                                                                              | -                                 | 0.000 | C-224A +/-, G65C +/-, G1650T +/-, G2653A +/-                                                                                       |
| 2140              | Translocated   | 14 | A165G, T235G, T334G, C373T, A489G, A492C, G503A, A517G, <u>C747T</u> , <u>C839T</u> , <u>C842T</u> , G1312A, D34bp 1402-35, A1787G                             | C747T, C839T (A42V), C842T (A43V) | 0.275 | G65C +/-, <u>G854A</u> (G47D) +/-, G2653A +/-                                                                                      |
| 2141              | -              | 0  | -                                                                                                                                                              | -                                 | 0.000 | C-224A +/-, G65C +/-, <u>A735G</u> (silent) +/-, G1650T +/-                                                                        |
| 2143              | -              | 0  | -                                                                                                                                                              | -                                 | 0.000 | C-224A +/-, G65C +/-, <u>A735G</u> (silent) +/-, G1650T +/-, G2653A +/-                                                            |
| 2144              | -              | 0  | -                                                                                                                                                              | -                                 | 0.000 | C-224A +/-, G65C +/-, <u>A735G</u> (silent) +/-, G1650T +/-, G2653A +/-                                                            |
| 2145 <sup>5</sup> | -              | 11 | C-144T, C194T, D5bp 320-4, D4bp 352-5, T357C, C362T, G624A, G710A, <u>G724T</u> , <u>G789C</u> , G1561A                                                        | G724T (A3S), G789C (Q24H)         | 0.177 | C-224A +/-, G65C +/-, <u>A735G</u> (silent) +/-, G1650T +/-, G2653A +/-                                                            |



|      |                       |     |                                                                                                                                                                                                                                                                                                                                                                                                                                                                                                                                                                                                                                                                                                                                                                                                                                                                                                                                                                                                                                                                                                                                                                                                                                                                                                                                                                                                                                   |                                                                                                                                                                                                                                                                                                                                                                                                        |       |                                                                                                                                                                    |
|------|-----------------------|-----|-----------------------------------------------------------------------------------------------------------------------------------------------------------------------------------------------------------------------------------------------------------------------------------------------------------------------------------------------------------------------------------------------------------------------------------------------------------------------------------------------------------------------------------------------------------------------------------------------------------------------------------------------------------------------------------------------------------------------------------------------------------------------------------------------------------------------------------------------------------------------------------------------------------------------------------------------------------------------------------------------------------------------------------------------------------------------------------------------------------------------------------------------------------------------------------------------------------------------------------------------------------------------------------------------------------------------------------------------------------------------------------------------------------------------------------|--------------------------------------------------------------------------------------------------------------------------------------------------------------------------------------------------------------------------------------------------------------------------------------------------------------------------------------------------------------------------------------------------------|-------|--------------------------------------------------------------------------------------------------------------------------------------------------------------------|
| 2147 | Amplification         | 0   | -                                                                                                                                                                                                                                                                                                                                                                                                                                                                                                                                                                                                                                                                                                                                                                                                                                                                                                                                                                                                                                                                                                                                                                                                                                                                                                                                                                                                                                 | -                                                                                                                                                                                                                                                                                                                                                                                                      | 0.000 | C-322A +/-, A-309G +/-, C-224A +/-, C-160T +/-, +GGG stretch 61-4 +/-, G65C +/-, <u>A735G</u> (silent) +/-, G1650T +/-, (G2653A +/-)                               |
| 2148 | - <sup>3</sup>        | 0   | -                                                                                                                                                                                                                                                                                                                                                                                                                                                                                                                                                                                                                                                                                                                                                                                                                                                                                                                                                                                                                                                                                                                                                                                                                                                                                                                                                                                                                                 | -                                                                                                                                                                                                                                                                                                                                                                                                      | 0.000 | C-224A +/-, G65C +/-, <u>A735G</u> (silent) +/-, G1650T +/-, (G2653A +/-)                                                                                          |
| 2151 | -                     | 3   | D15bp 191-205, C447T, C604T                                                                                                                                                                                                                                                                                                                                                                                                                                                                                                                                                                                                                                                                                                                                                                                                                                                                                                                                                                                                                                                                                                                                                                                                                                                                                                                                                                                                       | -                                                                                                                                                                                                                                                                                                                                                                                                      | 0.042 | C-224A +/-, G65C +/-, <u>C698T</u> +/-, <u>A735G</u> (silent) +/-, G1650T +/-, G2653A +/-                                                                          |
| 2152 | -                     | 0   | -                                                                                                                                                                                                                                                                                                                                                                                                                                                                                                                                                                                                                                                                                                                                                                                                                                                                                                                                                                                                                                                                                                                                                                                                                                                                                                                                                                                                                                 | -                                                                                                                                                                                                                                                                                                                                                                                                      | 0.000 | C-224A +/-, G65C +/-, <u>A735G</u> (silent) +/-, G1650T +/-, (G2653A +/-)                                                                                          |
| 2154 | Amplification         | 0   | -                                                                                                                                                                                                                                                                                                                                                                                                                                                                                                                                                                                                                                                                                                                                                                                                                                                                                                                                                                                                                                                                                                                                                                                                                                                                                                                                                                                                                                 | -                                                                                                                                                                                                                                                                                                                                                                                                      | 0.000 | C-224A +/-, G65C +/-, <u>A735G</u> (silent) +/-, G1650T +/-, G2653A +/-                                                                                            |
| 2156 | -                     | 1   | T-693C                                                                                                                                                                                                                                                                                                                                                                                                                                                                                                                                                                                                                                                                                                                                                                                                                                                                                                                                                                                                                                                                                                                                                                                                                                                                                                                                                                                                                            | -                                                                                                                                                                                                                                                                                                                                                                                                      | 0.015 | C-224A +/-, G65C +/-, <u>A735G</u> (silent) +/-, C1438G +/-, G1650T +/-, (G2653A +/-)                                                                              |
| 2157 | t(14;18) <sup>3</sup> | 150 | G-167T, G-155A, G-153A, G-141T, A-137G, C-131T, G-127A, A-126G, A-112C, A-95T, A-85G, A-83G, G-39C, C-38T, A-32T, G-19A, A25T, C53T, C69G, D23bp 74-96, C99T, A101G, A109G, G114C, C161T, A170C, G181C, C189A, G191A, A193T, C194A, A199G, A201C, G208A, A210G, G212A, C217G, T234G, T269G, T270C, T274G, A290G, A292C, A307C, C309T, D3bp 333-5, T338A, G344T, G346C, T347C, A348G, T349G, D2bp 351-2, T354A, C356T, T359A, A361G, DG 362, T363A, G366A, G368C, G370T, A372T, C373T, D4bp 376-9, A380C, C383T, A384C, T387A, D10bp 391-400, T401G, T406G, T407G, G408C, T410A, T412G, T413C, T414C, T417G, T418G, A419C, C421A, T423A, T424C, DG 429, T431G, C432T, A433G, G436C, G442C, T443G, A444C, G445A, A452C, A455C, D14bp 461-71, A475G, C476G, A558C, G603T, C604T, A612C, DA 614, T618G, A619G, A625C, T626C, C632G, T638G, C644A, G678A, T701C, C704T, G710A, G713A, <u>G718A</u> , <u>T726A</u> , <u>C734T</u> , <u>G765A</u> , <u>A790C</u> , <u>A849T</u> , <u>C861A</u> , <u>G876A</u> , <u>G882A</u> , <u>C890T</u> , <u>C893T</u> , <u>G895A</u> , <u>C920G</u> , <u>C921T</u> , <u>G924A</u> , <u>C925T</u> , <u>C928T</u> , <u>C936T</u> , <u>G940A</u> , <u>G967A</u> , <u>C968T</u> , <u>C970T</u> , <u>C972T</u> , <u>C975G</u> , <u>C976T</u> , <u>G979C</u> , <u>C982T</u> , <u>A984C</u> , <u>G991A</u> , <u>C1052T</u> , <u>C1065T</u> , <u>G1068A</u> , <u>G1071A</u> , <u>C1100A</u> , <u>C1106A</u> | G718A (A2T), T726A, C734T (T7I), G765A, A790C, A849T, C861A (F49L), G876A, G882A, C890T (P59L), C893T (A60V), G895A (A61T), C920G, C921T (T69S), G924A, C925T (P71S), C928T, C936T, G940A (A76T), G967A, C968T, G969A (A85I), C970T, C972T (L86F), C975G (S87R), C976T (P88S), G979C (V89L), C982T, A984C (P90S), G991A (V92I), C1052T (A113V), C1065T, G1068A, G1071A, G1100A (R129H), C1106A (A131D) | 2.212 | C-322A +/-, A-309G +/-, C-160T +/-, +GGG stretch 61-4 +/-, G65C +/-, G342A +/-, <u>C698T</u> +/-, <u>G854A</u> (G47D) +/-, <u>G969A</u> (silent) +/-, (G2653A +/-) |

|      |                |   |                                                                     |                      |       |                                                                                                                                                |
|------|----------------|---|---------------------------------------------------------------------|----------------------|-------|------------------------------------------------------------------------------------------------------------------------------------------------|
| 2158 | - <sup>4</sup> | 0 | -                                                                   | -                    | 0.000 | C-322A +/-, A-309G +/-, C-224A +/-, C-160T +/-, +GGG stretch 61-4 +/-, G65C +/-, G1650T +/-, (G2653A +/-)                                      |
| 2160 | -              | 0 | -                                                                   | -                    | 0.000 | C-224A +/-, G65C +/-, <u>A735G</u> (silent) +/-, G1650T +/-, G2653A +/-                                                                        |
| 2161 | -              | 0 | -                                                                   | -                    | 0.000 | C-224A +/-, G65C +/-, <u>C1014T</u> (silent) +/-, G1650T +/-                                                                                   |
| 2162 | -              | 0 | -                                                                   | -                    | 0.000 | C-224A +/-, G65C +/-, <u>A735G</u> (silent) +/-, G1650T +/-, (G2653A +/-)                                                                      |
| 2163 | -              | 0 | -                                                                   | -                    | 0.000 | G65C +/-, <u>A735G</u> (silent) +/-, G1650T +/-, G2653A +/-                                                                                    |
| 2164 | -              | 1 | C-103A                                                              | -                    | 0.014 | G65C +/-, G2653A +/-                                                                                                                           |
| 2165 | -              | 0 | -                                                                   | -                    | 0.000 | C-322A +/-, A-309G +/-, C-224A +/-, C-160T +/-, +GGG stretch 61-4 +/-, G65C +/-, <u>G841A</u> (A43T) +/-, G1650T +/-, G2653A +/-               |
| 2166 | Amplification  | 0 | -                                                                   | -                    | 0.000 | C-224A +/-, G65C +/-, <u>A735G</u> (silent) +/-, G1650T +/-, G2653A +/-                                                                        |
| 2167 | - <sup>3</sup> | 0 | -                                                                   | -                    | 0.000 | C-322A +/-, A-309G +/-, C-224A +/-, C-160T +/-, +GGG stretch 61-4 +/-, G65C +/-, <u>A735G</u> (silent) +/-, G1650T +/-, T1900C +/-, G2653A +/- |
| 2168 | - <sup>3</sup> | 2 | C-106T, C1580T                                                      | -                    | 0.028 | G65C +/-, G2653A +/-                                                                                                                           |
| 2169 | -              | 0 | -                                                                   | -                    | 0.000 | G65C +/-, G2653A +/-                                                                                                                           |
| 2170 | - <sup>3</sup> | 0 | -                                                                   | -                    | 0.000 | C-322A +/-, A-309G +/-, C-160T +/-, +GGG stretch 61-4 +/-, G65C +/-, G342A +/-, (G2653A +/-)                                                   |
| 2171 | -              | 0 | -                                                                   | -                    | 0.000 | C-224A +/-, G65C +/-, <u>A735G</u> (silent) +/-, G1650T +/-, G2653A +/-                                                                        |
| 2172 | Translocated   | 7 | G-297A, G-181T, T638C, T661C, <u>G940A</u> , <u>C1075T</u> , A1559G | G940A (A76T), C1075T | 0.103 | C-224A +/-, G65C +/-, <u>A735G</u> (silent) +/-, G1360A +/-, (G2653A +/-)                                                                      |
| 2173 | Amplification  | 0 | -                                                                   | -                    | 0.000 | G65C +/-, (G2653A +/-)                                                                                                                         |
| 2174 | - <sup>4</sup> | 0 | -                                                                   | -                    | 0.000 | C-322A +/-, A-309G +/-, C-224A +/-, C-160T +/-, +GGG stretch 61-4 +/-, G65C +/-, <u>A735G</u> (silent) +/-, G1650T +/-, G2653A +/-             |
| 2175 | Amplification  | 0 | -                                                                   | -                    | 0.000 | C-224A +/-, G65C +/-, <u>A735G</u> (silent) +/-, G1650T +/-, G2653A +/-                                                                        |

|                   |                           |    |                                                                                                                                                              |       |       |                                                                                                                                                |
|-------------------|---------------------------|----|--------------------------------------------------------------------------------------------------------------------------------------------------------------|-------|-------|------------------------------------------------------------------------------------------------------------------------------------------------|
| 2176 <sup>5</sup> | Translocated              | 2  | C42T, G1391A                                                                                                                                                 | -     | 0.028 | C-486T, C-322A +/-, A-309G +/-, C-224A +/-, C-160T +/-, +GGG stretch 61-4 +/-, G65C +/-, <u>A735G</u> (silent) +/-, G1650T +/-, G2653A +/-     |
| 2180              | -                         | 0  | -                                                                                                                                                            | -     | 0.000 | C-224A +/-, G65C +/-, G1650T +/-, G2653A +/-                                                                                                   |
| 2182              | -                         | 0  | -                                                                                                                                                            | -     | 0.000 | C-224A +/-, G65C +/-, G1650T +/-, G2653A +/-                                                                                                   |
| 2184              | -                         | 0  | -                                                                                                                                                            | -     | 0.000 | G65C +/-, (G2653A +/-)                                                                                                                         |
| 2187              | -                         | 0  | -                                                                                                                                                            | -     | 0.000 | C-224A +/-, G65C +/-, G1650T +/-, G2653A +/-                                                                                                   |
| 2189              | t(14;18)                  | 0  | -                                                                                                                                                            | -     | 0.000 | C-224A +/-, G65C +/-, <u>A735G</u> (silent) +/-, G1650T +/-, G2653A +/-                                                                        |
| 2190              | -                         | 0  | -                                                                                                                                                            | -     | 0.000 | C-224A +/-, G65C +/-, <u>A735G</u> (silent) +/-, G1650T +/-, G2653A +/-                                                                        |
| 2191              | -                         | 0  | -                                                                                                                                                            | -     | 0.000 | G65C +/-, G2653A +/-                                                                                                                           |
| 2192              | -                         | 1  | C673T                                                                                                                                                        | -     | 0.014 | G65C +/-, G2653A +/-                                                                                                                           |
| 2193              | Translocated <sup>7</sup> | 0  | -                                                                                                                                                            | -     | 0.000 | C-224A +/-, G65C +/-, G1650T +/-, G2653A +/-                                                                                                   |
| 2194              | Amplification             | 0  | -                                                                                                                                                            | -     | 0.000 | G65C +/-, G2653A +/-                                                                                                                           |
| 2195              | -                         | 0  | -                                                                                                                                                            | -     | 0.000 | C-224A +/-, G65C +/-, <u>A735G</u> (silent) +/-, G1650T +/-, G2653A +/-                                                                        |
| 2196              | t(14;18) <sup>3</sup>     | 20 | G-563A, A-560T, A-377G, A-317T, A-289T, C194G, A228T, A282T, A290C, G344A, G346A, G370A, A471G, G684A, <u>G738A</u> , T1483C, C1496T, C1510T, C1518T, G1599A | G738A | 0.282 | C-224A +/-, G65C +/-, C698T +/-, <u>A735G</u> (silent) +/-, C969A (silent) +/-, G1650T +/-, G2653A +/-                                         |
| 2197              | - <sup>3</sup>            | 0  | -                                                                                                                                                            | -     | 0.000 | C-322A +/-, A-309G +/-, C-160T +/-, +GGG stretch 61-4 +/-, G65C +/-, G2653A +/-                                                                |
| 2198              | - <sup>3</sup>            | 0  | -                                                                                                                                                            | -     | 0.000 | C-322A +/-, A-309G +/-, C-160T +/-, +GGG stretch 61-4 +/-, G65C +/-, G2653A +/-                                                                |
| 2199              | - <sup>3</sup>            | 0  | -                                                                                                                                                            | -     | 0.000 | C-322A +/-, A-309G +/-, C-224A +/-, C-160T +/-, +GGG stretch 61-4 +/-, G65C +/-, <u>A735G</u> (silent) +/-, G1650T +/-, T1900C +/-, G2653A +/- |
| 2200              | - <sup>3</sup>            | 0  | -                                                                                                                                                            | -     | 0.000 | G65C +/-, G2653A +/-                                                                                                                           |

### **Legend**

Numbers according to GenBank accession number NM\_000633 (position 1 corresponds to the first nucleotide of exon 1), amino acid changes according to NM\_000624

Annotations: bp, base pairs, e.g. A130T (A at position 130 changed to T), D, deletion, + insertion, dupl., duplication, changes in coding underlined, NA not available (no product in two independent PCR products), ND, not done

All changes in heterozygosis (+/-), except Ly2 (except otherwise noted), and SUDHL7 (+/-, in heterozygosis, +/+, in homozygosis)

Mutations: changes not reported as polymorphisms, or of proven somatic origin (see remark #5)

Polymorphisms: according to NCBI and Ensembl SNP database, published (Park et al, J Hum Genet 2004) or proven with matched normal DNA (see remark #5), +/-, in heterozygosis, +/+, in homozygosis; changes in *italic* are not reported in SNP databases, but considered as likely polymorphisms as they were seen in more than three samples

<sup>1</sup> Ly2 shares most mutations with Ly1 (data of Ly1 not shown)

<sup>2</sup> t(14;18) status in cell lines according to Mehra S et al, Genes Chrom Cancer 2002;33:225-34, Deng J et al, Cancer Cell 2007;12:171-85, Sanchez-Izquierdo et al, Blood 2003;101:4539-46, Kaiser-McCaw Hecht, B et al, Cancer Genet Cytogenet 1985;14:205-18, Abe M et al, Cancer 1988;61:483-90, Amini RA et al, Leuk Lymph 2002;43:2179-89, and DSMZ ([www.dsmz.de](http://www.dsmz.de))

<sup>3</sup> t(14;18) status determined by PCR only (BIOMED-2, van Dongen JJM et al, Leukemia 2003; 17; 2257-2317), FISH (BCL2 BA) in 3 different cores for the other cases (see also remark #4)

<sup>4</sup> Result by FISH in 1 of 3 cores only

<sup>5</sup> Cases with matched normal DNA (somatic origin of mutations / polymorphisms proven)

<sup>6</sup> as determined in the region analyzed

<sup>7</sup> Non-IgH rearrangement of BCL2
