# Supplementary material
Source: PubMed Central journal article supplement (PMC2708681)
Supplement: 0903854106_ST2_PDF.pdf [file 0903854106_ST2_PDF.pdf]

**Table S2 - Features of BCL2 mutations in DLBCL**

| <b>Features</b>                            | <b>BCL2 translocation -</b> | <b>BCL2 translocation +</b> |
|--------------------------------------------|-----------------------------|-----------------------------|
| <b>Single bp substitutions</b>             | 113                         | 955                         |
| <b>Deletions, duplications, insertions</b> | 11                          | 30                          |
| <b>Transitions</b>                         |                             |                             |
| <b>G → A</b>                               | 18 (16.5)                   | 143 (15.6)                  |
| <b>A → G</b>                               | 13 (11.9)                   | 118 (12.9)                  |
| <b>T → C</b>                               | 12 (9.9)                    | 106 (10.3)                  |
| <b>C → T</b>                               | 30 (25.8)                   | 142 (14.5)                  |
| <b>Transversions</b>                       |                             |                             |
| <b>C → G</b>                               | 4 (3.4)                     | 64 (6.6)                    |
| <b>C → A</b>                               | 4 (3.4)                     | 27 (2.8)                    |
| <b>G → T</b>                               | 5 (4.6)                     | 29 (3.2)                    |
| <b>G → C</b>                               | 10 (9.2)                    | 78 (8.5)                    |
| <b>A → T</b>                               | 6 (5.5)                     | 59 (6.4)                    |
| <b>A → C</b>                               | 7 (6.4)                     | 69 (7.5)                    |
| <b>T → G</b>                               | 2 (1.6)                     | 60 (5.9)                    |
| <b>T → A</b>                               | 2 (1.6)                     | 60 (5.9)                    |
| <b>Transitions/Transversions ratio</b>     | 1.95                        | 1.14                        |
| <b>% Mutations at G/C</b>                  | 63                          | 51.1                        |
| <b>% Mutations at A/T</b>                  | 37                          | 48.9                        |
| <b>RGYW / WRCY BIAS<sup>1</sup></b>        |                             |                             |
| <b>G within RGYW / WRCY</b>                | +                           | +                           |
| <b>any bp within RGYW / WRCY</b>           | +                           | +                           |
| <b>DGYW / WRCH BIAS<sup>2</sup></b>        |                             |                             |
| <b>G within DGYW / WRCH</b>                | +                           | +                           |
| <b>any bp within DGYW / WRCH</b>           | +                           | +                           |

The frequency of substitutions affecting each base was corrected for the base composition of the unmutated sequences (Gojobory et al, J Mol Evol, 1982;18:414-23). The bias at RGYW and DGYW motifs was determined by a binomial test.

<sup>1</sup>Neuberger MS et al, Immunol Rev 1998;162:107-116

<sup>2</sup>Rogozin IB, Diaz M J Immunol 2004;172:3382-84
