# Supplementary material
Source: PubMed Central journal article supplement (PMC2708681)
Supplement: 0903854106_ST3_PDF.pdf [file 0903854106_ST3_PDF.pdf]

**Table S3 - PCR primers and protocols**

**1. Mutational Screening (genomic DNA)**

| Product        | Primer                   | Sequence (5'-3')        | Localization <sup>1</sup> | Buffer                       | Annealing (°C) |
|----------------|--------------------------|-------------------------|---------------------------|------------------------------|----------------|
| A1             | BCL2-FOR2                | TGAATGAACCGTGTGACGTTA   | Promoter                  | Buffer 3 <sup>2,3</sup>      | 58             |
|                | BCL2-REV3                | ACGATCCCATCAATCTTCAGC   | Exon 1                    |                              |                |
| A2             | BCL2-FOR4                | TGGGAATCGATCTGGAAATCCTC | Exon 1                    | Buffer 3 <sup>2,3</sup>      | 62             |
|                | BCL2-REV5                | TCAGGTGGACCACAGGTGGC    | Exon 2                    |                              |                |
| A3             | BCL2-FOR6                | GTCGCCAGGACCTCGCCG      | Exon 2                    | Buffer 3 <sup>2,3</sup>      | 60             |
|                | BCL2-REV7                | TACAAAGAATGCAGCCGATG    | Intron 2                  |                              |                |
| A4             | BCL2-FOR8                | AACAAGCTCCCCTGAAACAA    | Intron 2                  | Buffer 3 <sup>2,3</sup>      | 60             |
|                | BCL2-REV8                | ACACCAAACAGTGGCATCAA    | Intron 2                  |                              |                |
| A5             | BCL2-FOR9                | TTGTGTATGGTTTACCAGTTTGC | Intron 2                  | Buffer 3 <sup>2,3</sup>      | 62             |
|                | BCL2-REV9                | CATGTGTCTCTGTTTCCACA    | Intron 2                  |                              |                |
| B <sup>8</sup> | BCL2-Luc-F1 <sup>8</sup> | GGACCAGGAGGAGGAGAAAG    | Promoter                  | Reaction Buffer <sup>4</sup> | 64             |
|                | BCL2-Luc-R1 <sup>8</sup> | ATCAGGTGCGTTTCCCTGTA    | Intron 1                  |                              |                |
| C              | BCL2-F10                 | GAGGCGTGAAGCGGTCCCGT    | Promoter                  | Buffer 3 <sup>2,5</sup>      | 58             |
|                | BCL2-P012-LUC-R2         | CTGAAGAGCTCCTCCACCAC    | Exon 2                    |                              |                |
| D <sup>9</sup> | BCL2-F15'                | GGGGGAGAACTTCGTAGCA     | Promoter                  | Buffer 3 <sup>2,3</sup>      | 62             |
|                | BCL2-R15'                | CCCCTCTGCGACAGCTTAT     | Exon 2                    |                              |                |
| E              | BCL2-FOR4                | TGGGAATCGATCTGGAAATCCTC | Exon 1                    | Pfu buffer <sup>5,6</sup>    | 62             |
|                | BCL2-REV5                | TCAGGTGGACCACAGGTGGC    | Exon 2                    |                              |                |

**2. RT-PCR amplification of BCL2-IgH translocated alleles<sup>10</sup>**

|   |           |                        |        |                            |    |
|---|-----------|------------------------|--------|----------------------------|----|
| F | BCL2-FOR5 | TGTTCCGCGTGATTGAAGACAC | Exon 2 | Pfu Cx buffer <sup>7</sup> | 55 |
|   | J6-REV    | TAGAGTGCCATTCTTACCT    | J6     |                            |    |

**3. qCHIP**

|      |               |                          |  |                                         |    |
|------|---------------|--------------------------|--|-----------------------------------------|----|
| BCL2 | BCL2-qCHIP-F4 | CGGAGTTTAATCAGAAGAGGATTC |  | SYBR green PCR master mix <sup>11</sup> | 60 |
|      | BCL2-R6       | TTCGCAGAAGTCCTGTGATG     |  |                                         |    |

**4. qRT-PCR**

|       |            |                             |  |                                         |    |
|-------|------------|-----------------------------|--|-----------------------------------------|----|
| BCL2  | BCL2_RT_F2 | CGGTTGGATGACTGAGTACCTGAACCG |  | SYBR green PCR master mix <sup>11</sup> | 60 |
|       | BCL2_RT_R2 | GCATCCCAGCCTCCGTTATC        |  |                                         |    |
| BCL6  | BCL6_RT_F  | CGCAACTCTGAAGAGCCACCTGCG    |  | SYBR green PCR master mix <sup>11</sup> | 60 |
|       | BCL6_RT_F  | TTTGTGACGGAAATGCAGGTTA      |  |                                         |    |
| GAPDH | GAPDH-RTF2 | CTGACTTCAACAGCGACACC        |  | SYBR green PCR master mix <sup>11</sup> | 60 |
|       | GAPDH-RTR2 | CCCTGTTGCTGTAGCCAAAT        |  |                                         |    |

**Legend:**

Templates: genomic DNA except product F (cDNA), sequencing primers available upon request

<sup>1</sup> Numbering according to GenBank accession No. NM\_000633

<sup>2</sup> Buffer 3 (Expanded Long Template PCR System, Roche, 14277200)

<sup>3</sup> 10x PCRx Enhancer Solution (Invitrogen # 52391)

<sup>4</sup> Taq DNA Polymerase (Invitrogen #10342-020) with 10x reaction buffer

<sup>5</sup> with DMSO

<sup>6</sup> Pfu Turbo (Stratagene #600250-52) with 10x buffer

<sup>7</sup> Pfu Turbo Cx (Stratagene #600410) with 10x buffer

<sup>8</sup> after digestion Ascl and EcoRV, the PCR products were also used for reporter constructs; for cases with mutations in primer sites, the following allele specific primers were used with the same PCR conditions:

2106: BCL2(2106)\_LUC\_F1 TATCAGGCGCGCCGACCAGGAGGAGGAGACAG

BCL2(2106)\_LUC\_R1 TCATTGATATCATCAGGTGCGCATCCCTATA

2027: BCL2(2027)\_LUC\_F2 TATCAGGCGCGCCCAGGACCAAGAGGAAACAGGG

BCL2(2027)\_LUC\_R1 TCATTGATATCATCAGGTGCGTTTCCCTGTG

SUDHL6: WT forward primer

BCL2(SUDHL6)\_LUC\_R1 TCATTGATATCATCAGGTGCGTATTCCCTGAA as the reverse primer

<sup>9</sup> used for SUDHL6 only

<sup>10</sup> used for DLBCL cell lines only

<sup>11</sup> SYBR green Applied Biosystems (#4309155)
